# Supplementary material for: Fabricating nano-IrO2@amorphous Ir-MOF composites for efficient overall water splitting: a one-pot solvothermal approach
Source: Royal Society of Chemistry journal article supplement (doi:10.1039/d0ta09168e), 2020-01-01
Supplement: d0ta09168e1.pdf [file d0ta09168e1.pdf]

## Supporting Information

### Fabricating Nano-IrO<sub>2</sub>@amorphous Ir-MOFs Composites for Efficient Overall Water Splitting: One-pot Solvothermal Approach

Lei Li<sup>a</sup>, Guilin Li<sup>a</sup>, Yaping Zhang<sup>b</sup>, Wenjun Ouyang<sup>a</sup>, Huiwen Zhang<sup>c</sup>, Feifei Dong<sup>a</sup>, Xuehui Gao<sup>c,\*</sup> and Zhan Lin<sup>a,\*</sup>

<sup>a</sup> Guangzhou Key Laboratory of Clean Transportation Energy Chemistry, School of Chemical Engineering and Light Industry, Guangdong University of Technology, Guangzhou 510006, China. E-mail:

[zhanlin@gdut.edu.cn](mailto:zhanlin@gdut.edu.cn).

<sup>b</sup> State Key Laboratory of Environment-friendly Energy Materials, School of Materials Science and Engineering, Southwest University of Science and Technology, Mianyang 621010, China.

<sup>c</sup> Department of Chemistry, Key Laboratory of the Ministry of Education for Advanced Catalysis Materials Zhejiang Normal University, Jinhua 321004, China. E-mail: [gxb0357@zjnu.edu.cn](mailto:gxb0357@zjnu.edu.cn).

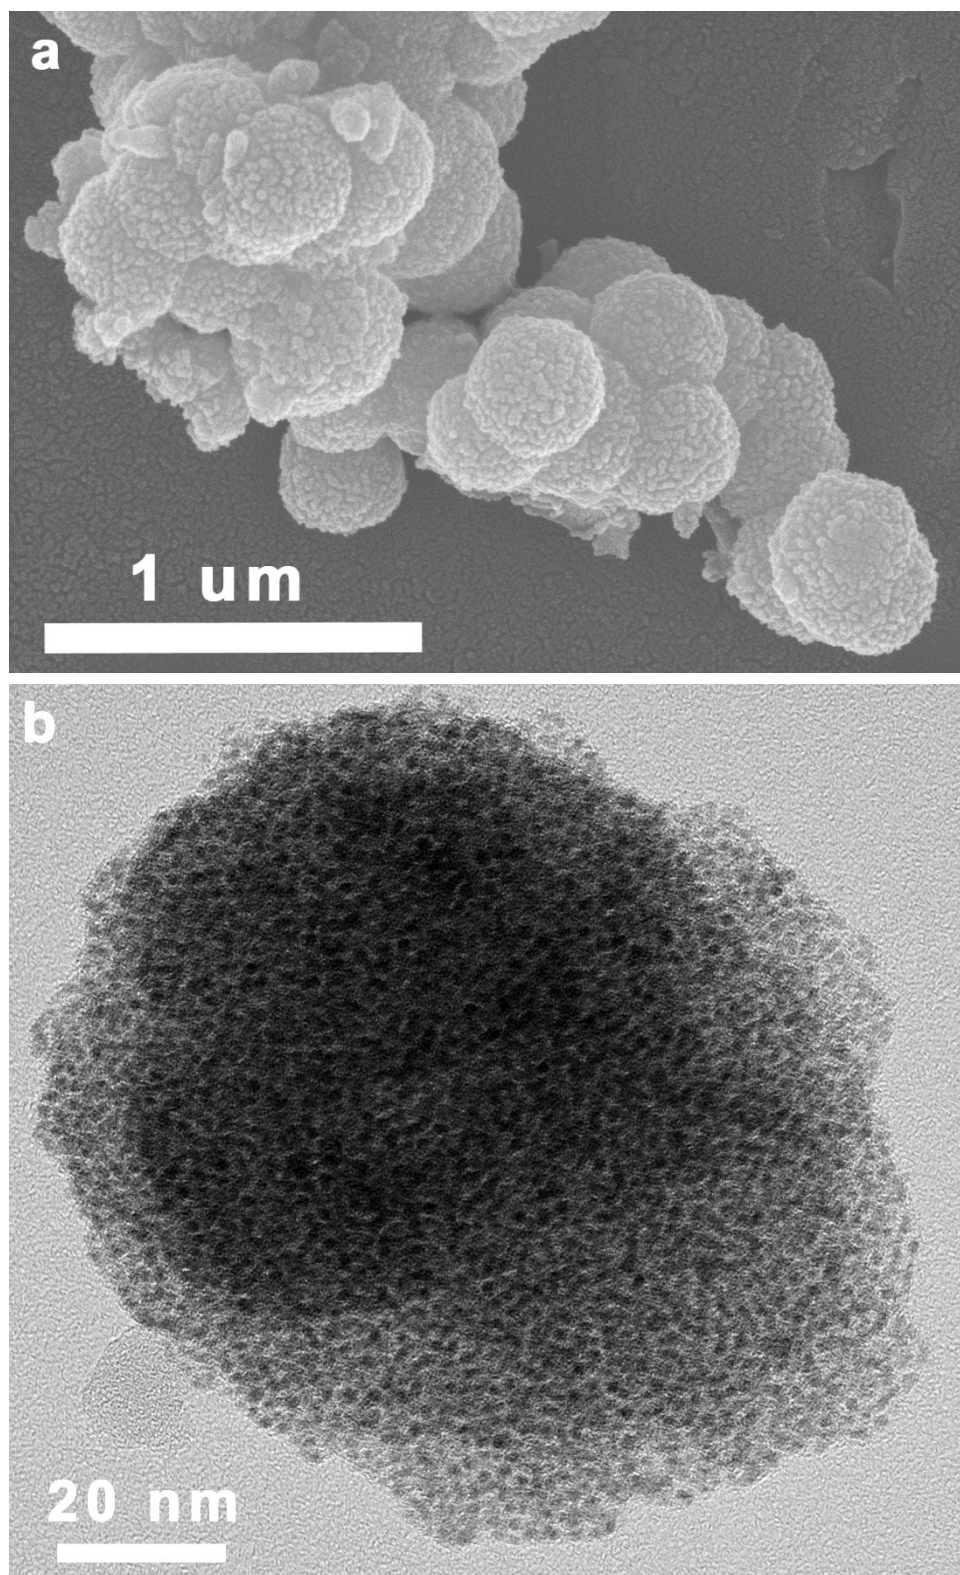

Figure S1. SEM (a) and TEM (b) images of IrO<sub>2</sub>@Ir-MOF.

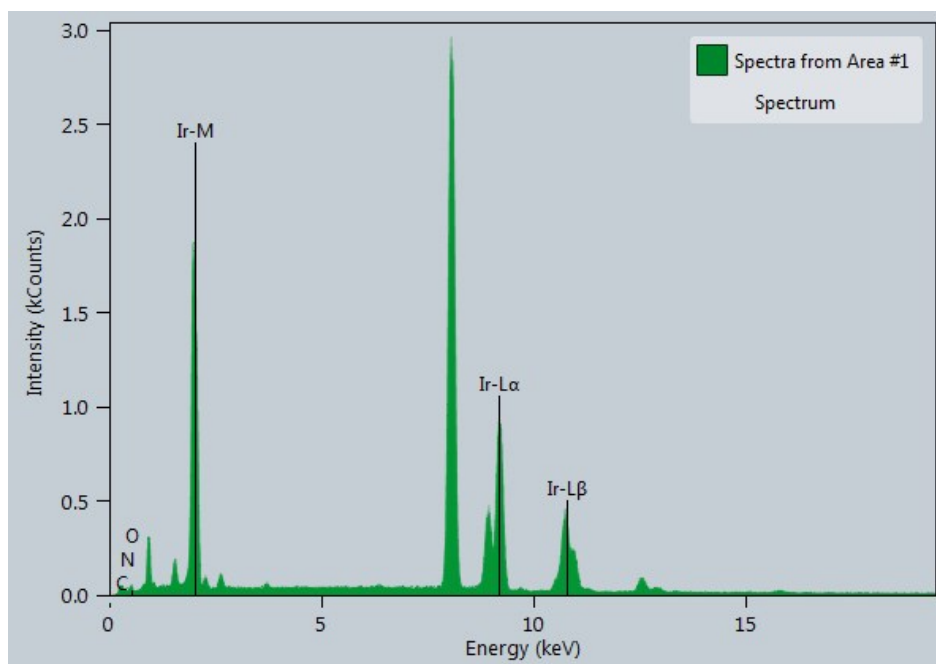

Figure S2. EDX of IrO<sub>2</sub>@Ir-MOF.

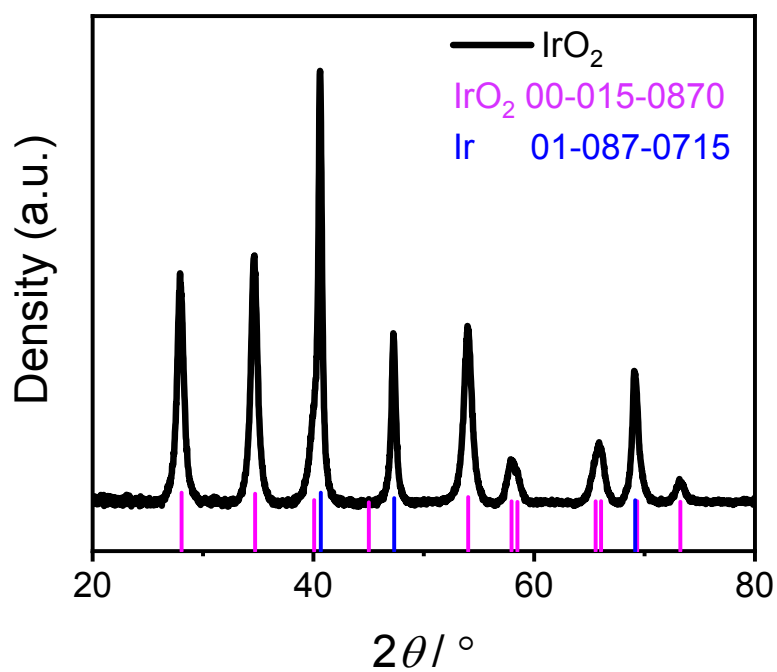

Figure S3. PXRD spectra of IrO<sub>2</sub>.

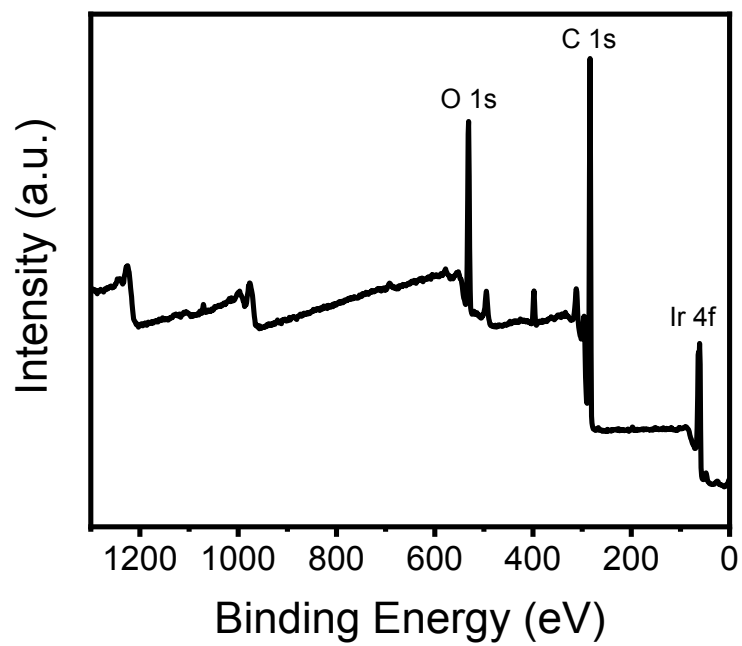

Figure S4. XPS spectra of IrO<sub>2</sub>@Ir-MOF.

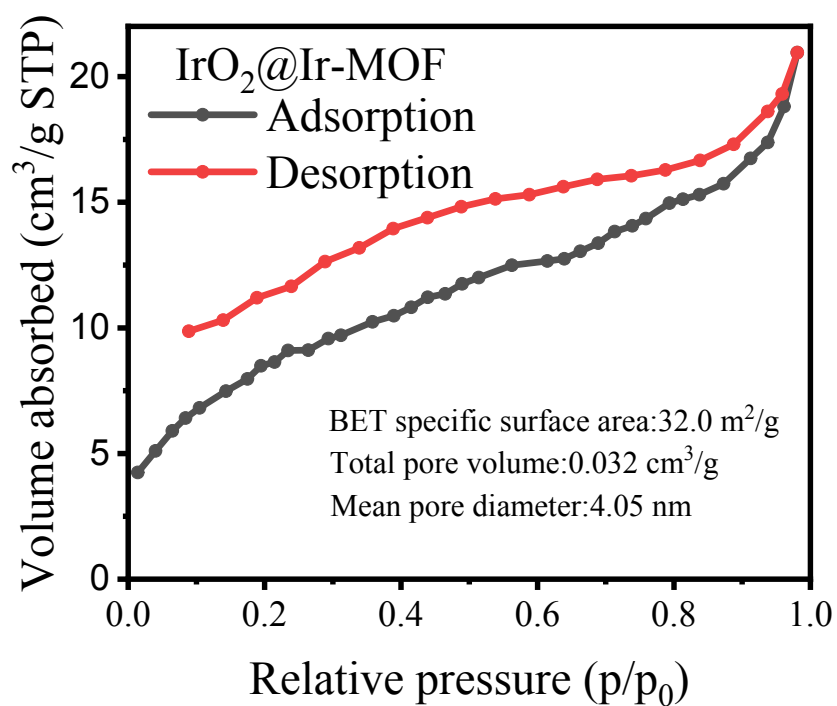

Figure S5. N<sub>2</sub> sorption isotherms of IrO<sub>2</sub>@Ir-MOF at 77k.

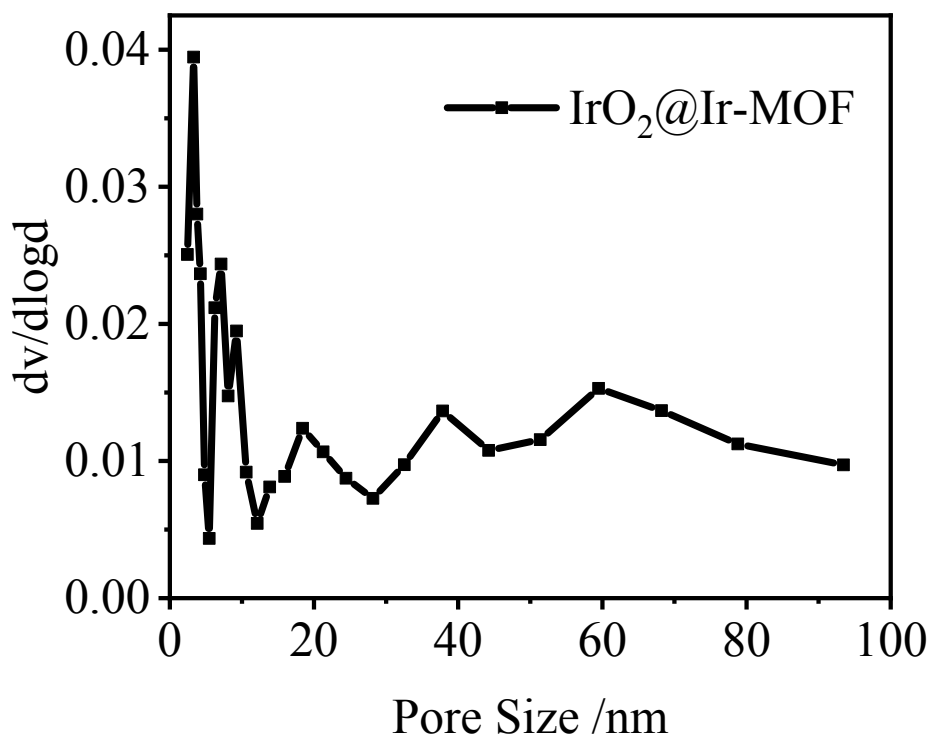

Figure S6. The corresponding mesoporous size distribution (BJH method) of IrO<sub>2</sub>@Ir-MOF.

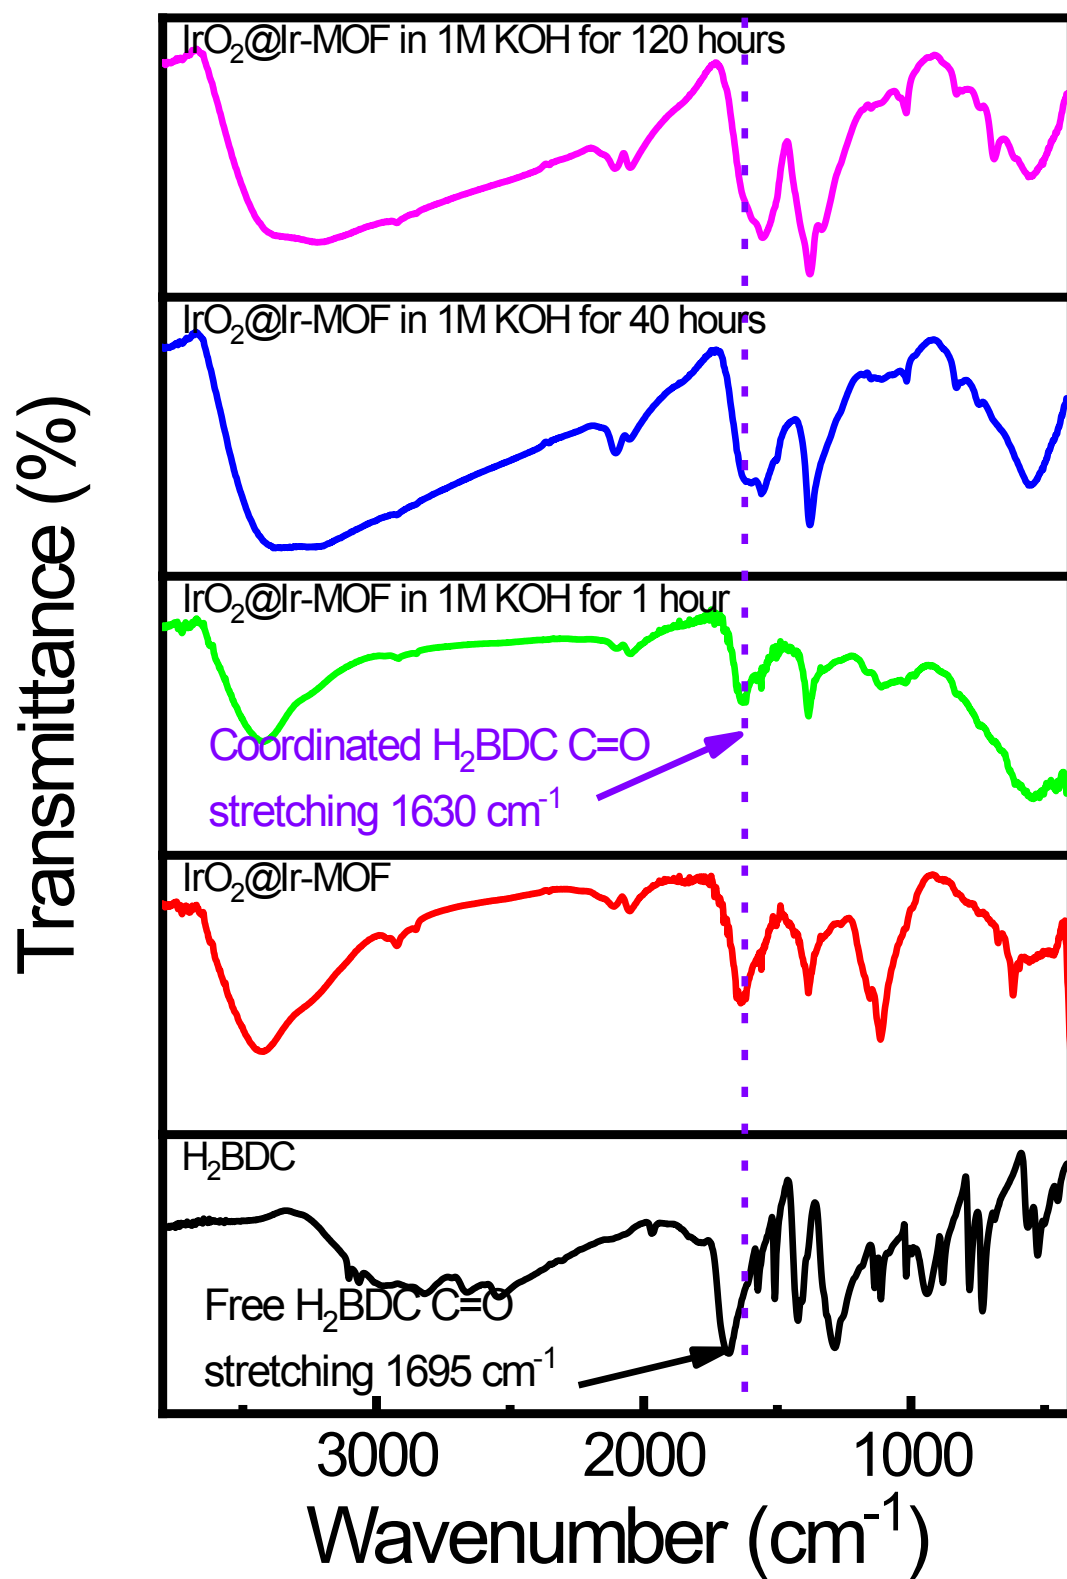

Figure S7. FTIR spectra of IrO<sub>2</sub>@Ir-MOF and H<sub>2</sub>BDC.

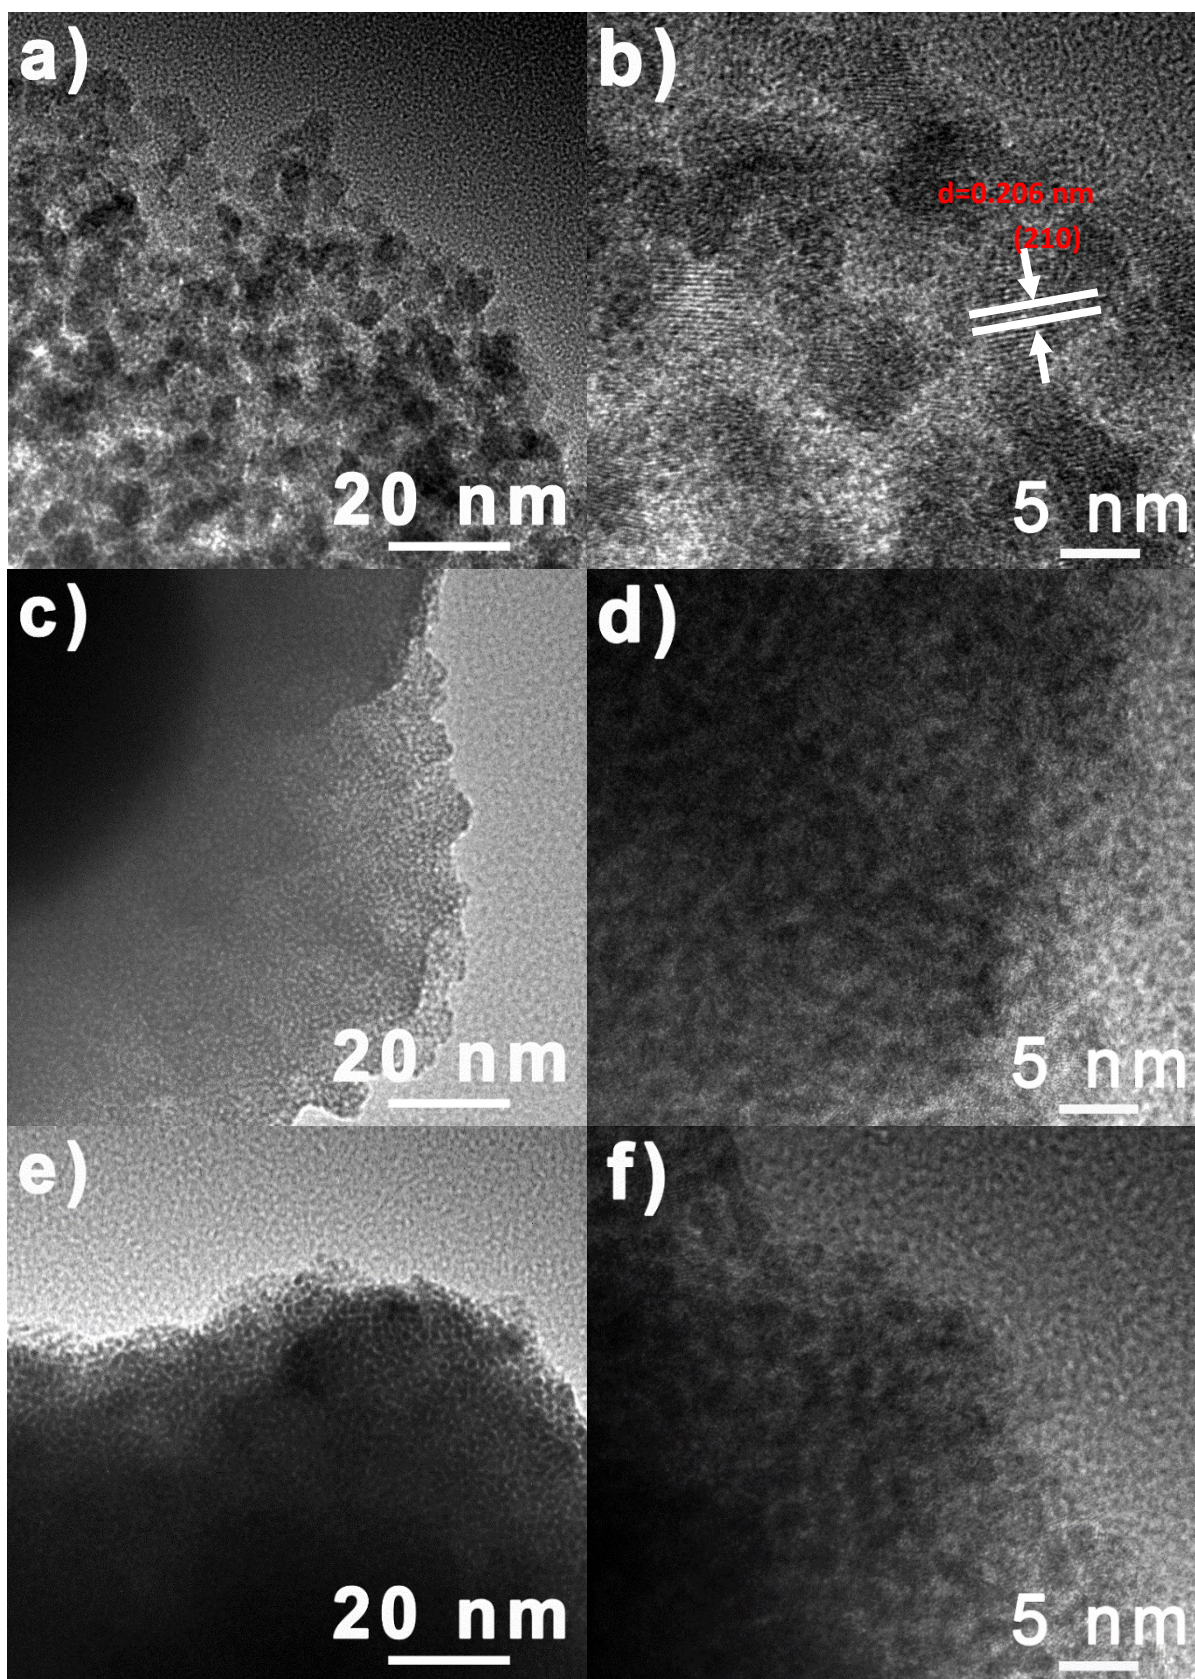

Figure S8. TEM images of IrO<sub>2</sub>@Ir-MOF soaked in 1 M KOH solution for 1 (a, b), 40 (c, d) and 120 (e, f) hours.

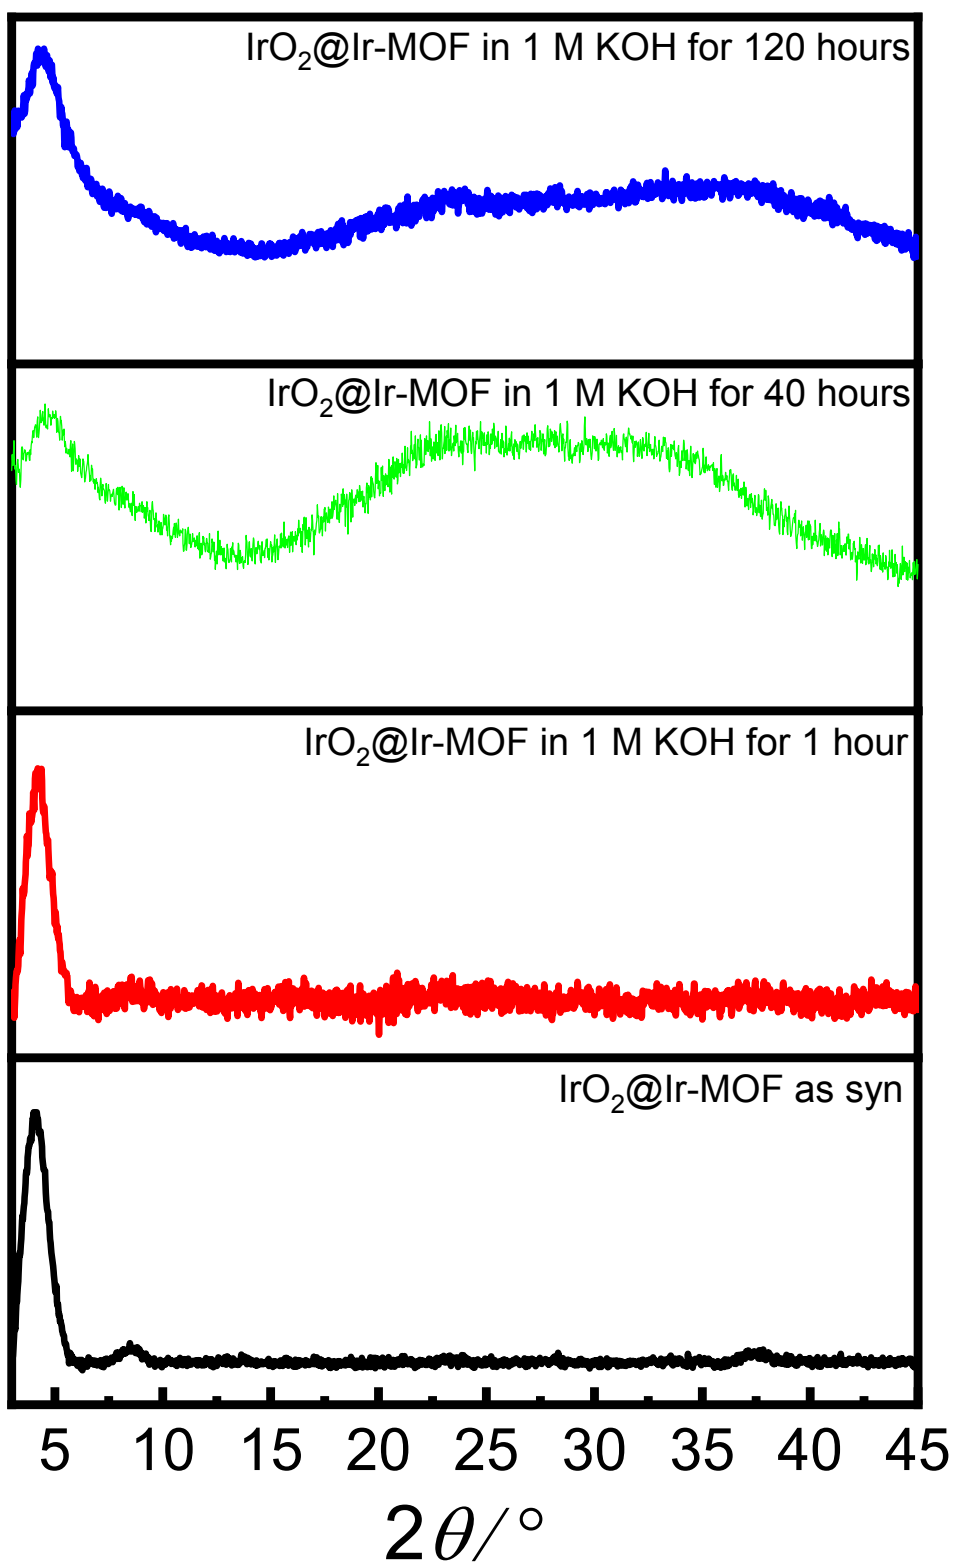

Figure S9. XRD patterns of as prepared IrO<sub>2</sub>@Ir-MOF and soaked in 1 M KOH.



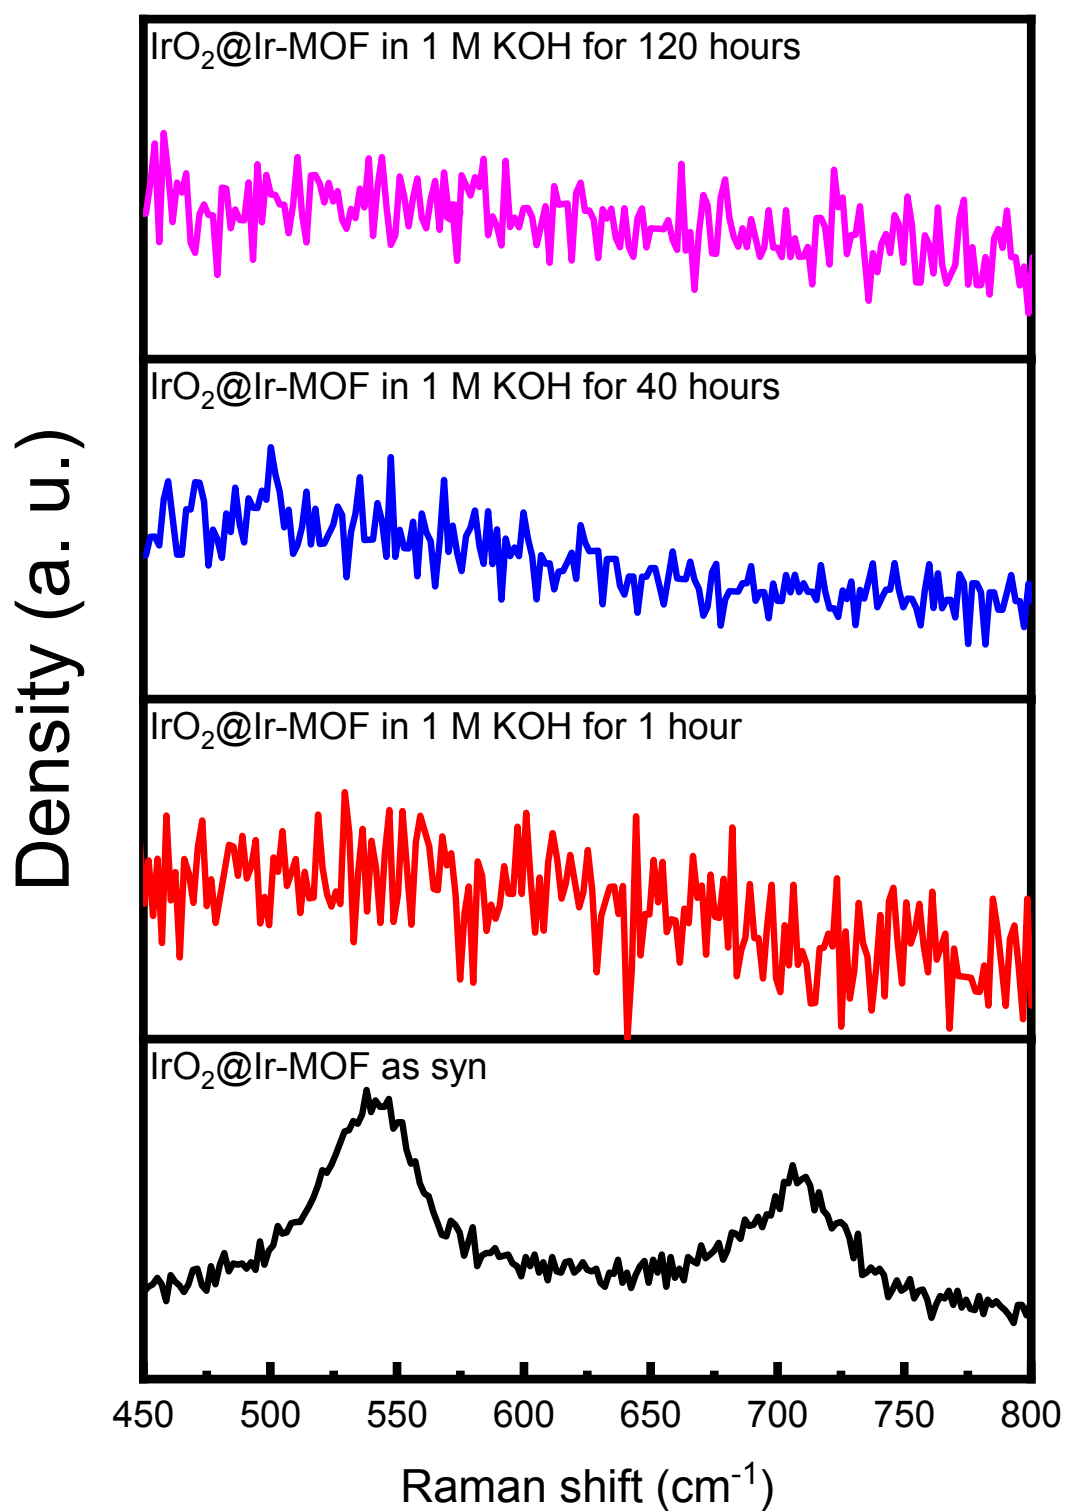

Figure S10. Raman spectra of as prepared IrO<sub>2</sub>@Ir-MOF and soaked in 1 M KOH.

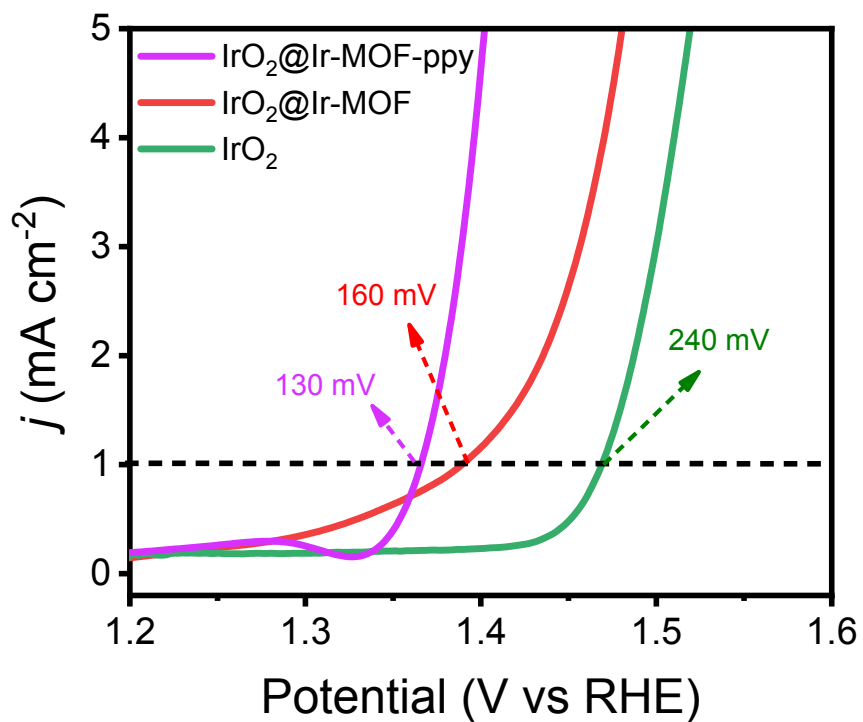

Figure S11. OER polarization curves.

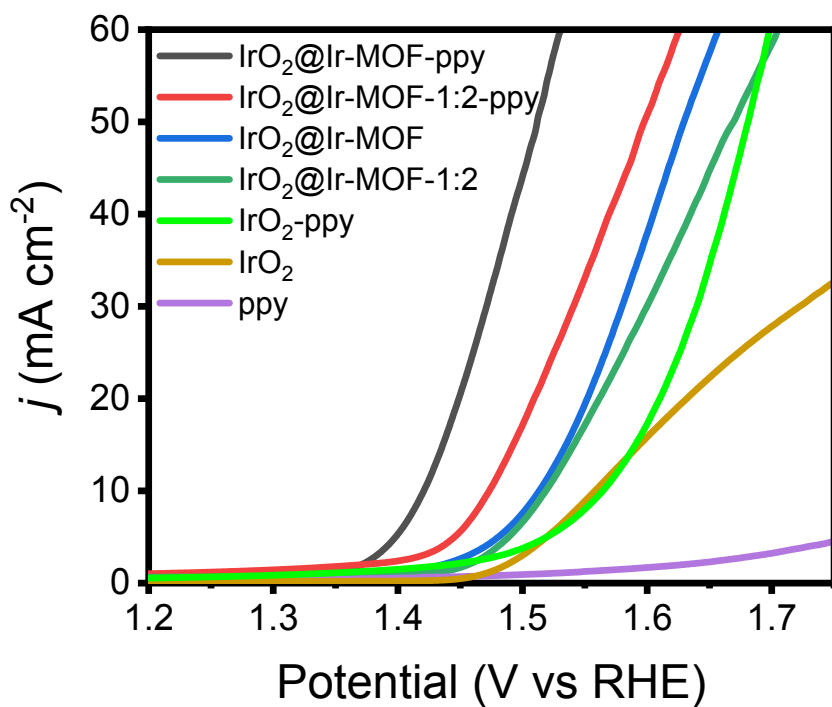

Figures S12. Linear sweep voltammetry curves toward OER.

Table S1. Comparison of the OER activity of Ir-based catalysts in 1 M KOH electrolytes.

| Catalyst                         | Overpotential ( $\eta_{10}$ , mV) |
|----------------------------------|-----------------------------------|
| IrO <sub>2</sub> @Ir-MOF-ppy     | 207                               |
| IrO <sub>2</sub> @Ir-MOF-1:2-ppy | 244                               |
| IrO <sub>2</sub> @Ir-MOF         | 284                               |
| IrO <sub>2</sub> @Ir-MOF-1:2     | 289                               |
| IrO <sub>2</sub> -ppy            | 332                               |
| IrO <sub>2</sub>                 | 328                               |
| ppy                              | ---                               |

Table S2. Summary of the recently reported OER electrocatalysts in 1 M KOH electrolytes.

| Catalyst                        | $\eta_{10}$ /mV | Catalyst Loading /mg cm <sup>-2</sup>               | Ref                                                 |
|---------------------------------|-----------------|-----------------------------------------------------|-----------------------------------------------------|
| IrO <sub>2</sub> @Ir-MOF        | 207             | 20.4 $\mu\text{g}_{\text{Ir}}$ cm <sup>-2</sup>     | This work                                           |
| IrO <sub>2</sub> /CC            | 209             | 35.5 $\mu\text{g}_{\text{Ir}}$ cm <sup>-2</sup>     | <i>Adv. Energy Mater.</i> <b>2020</b> , 2001600     |
| Ir NWs                          | 224             | None                                                | <i>Adv. Funct. Mater.</i> <b>2018</b> , 28, 1803722 |
| RuCu NSs/C-350 °C               | 234             | None                                                | <i>Angew. Chem. Int. Ed.</i> <b>2019</b> , 58, 2-8  |
| IrO <sub>2</sub> (1:100)-450 °C | 276             | 0.379 $\mu\text{g}_{\text{IrO}_2}$ cm <sup>-2</sup> | <i>Nanoscale</i> , <b>2017</b> , 9, 9291-9298       |

Table S3. The Ir loading of electrodes based on different catalysts calculated from ICP-OES.

| Catalysts                    | Ir loading ( $\mu\text{g cm}^{-2}$ ) |
|------------------------------|--------------------------------------|
| IrO <sub>2</sub> @Ir-MOF-ppy | 20.4                                 |
| IrO <sub>2</sub> @Ir-MOF     | 20.4                                 |
| ppy                          | None                                 |
| IrO <sub>2</sub>             | 80                                   |

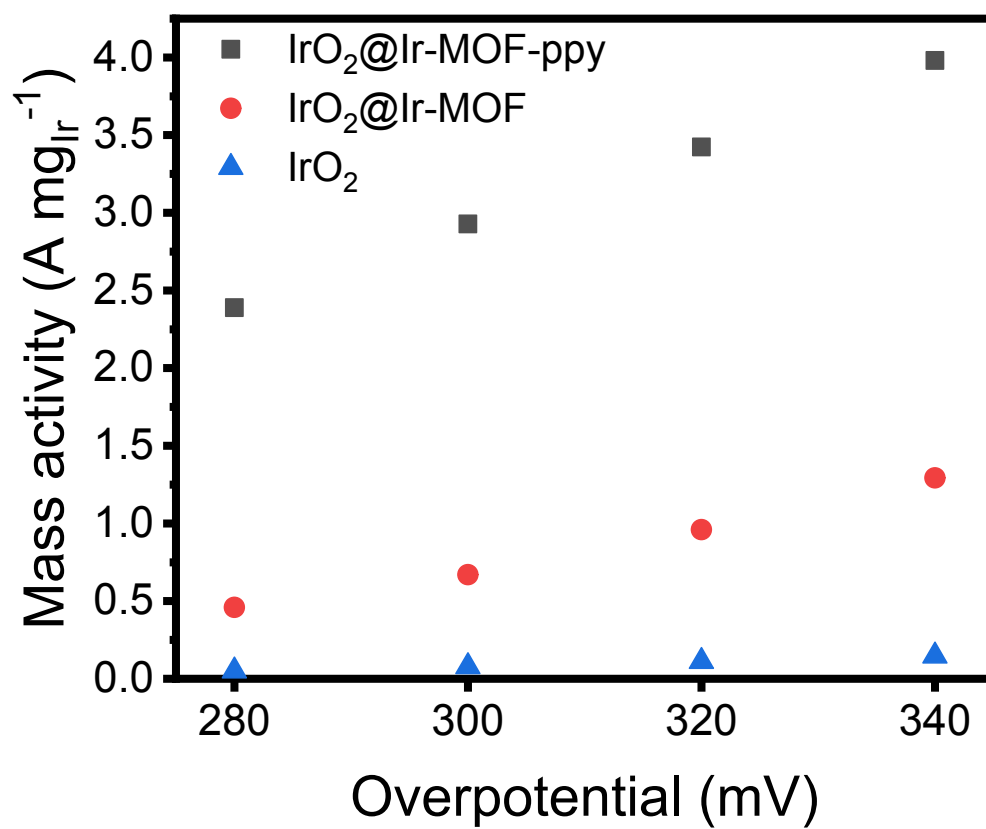

Figure S13. Mass activity of IrO<sub>2</sub>@Ir-MOF-ppy, IrO<sub>2</sub>@Ir-MOF and IrO<sub>2</sub> at 280, 300, 320, and 340 mV.

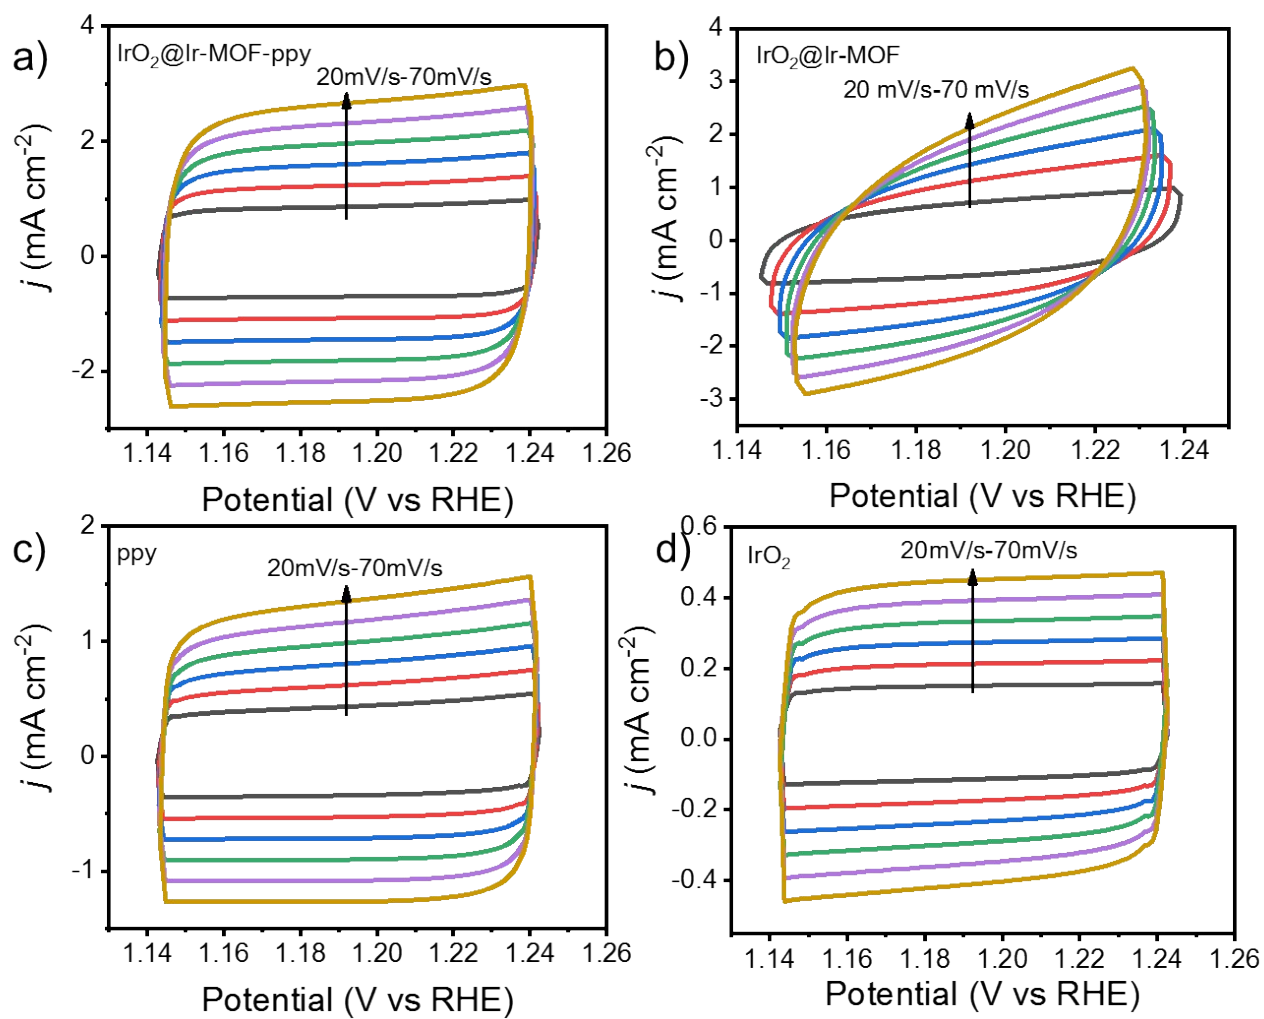

Figure S14. Cyclic voltammograms (CV) of IrO<sub>2</sub>@Ir-MOF-ppy, IrO<sub>2</sub>@Ir-MOF, ppy and IrO<sub>2</sub> in the window of 1.142~1.242 V vs. RHE at various scan rates (20, 30, 40, 50, 60 and 70 mV/s).

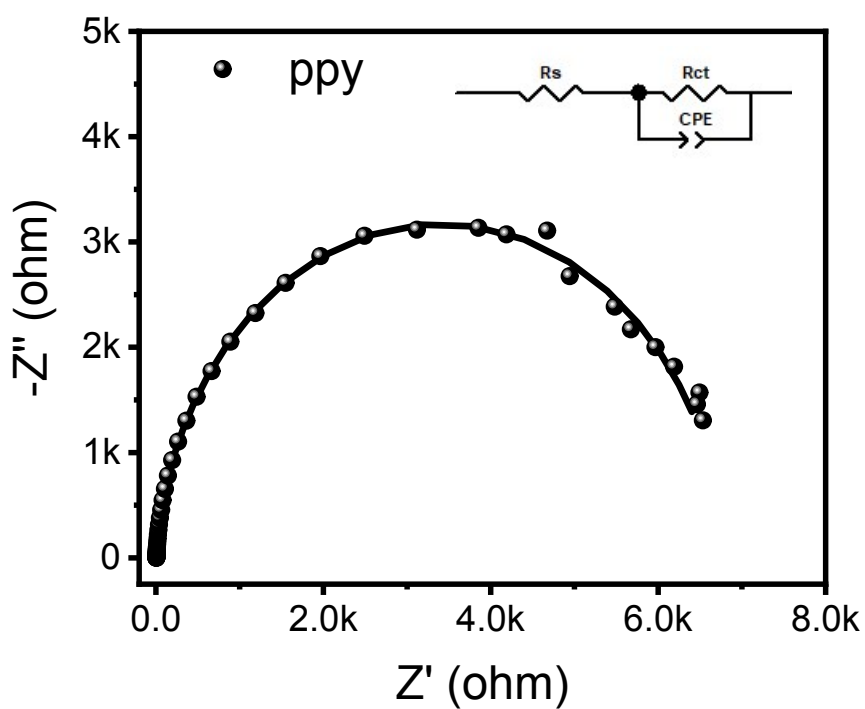

Figure S15. EIS spectra of ppy are recorded at 1.6 V vs. RHE with 5 mV amplitude in a frequency range from  $10^5$  to 1 Hz

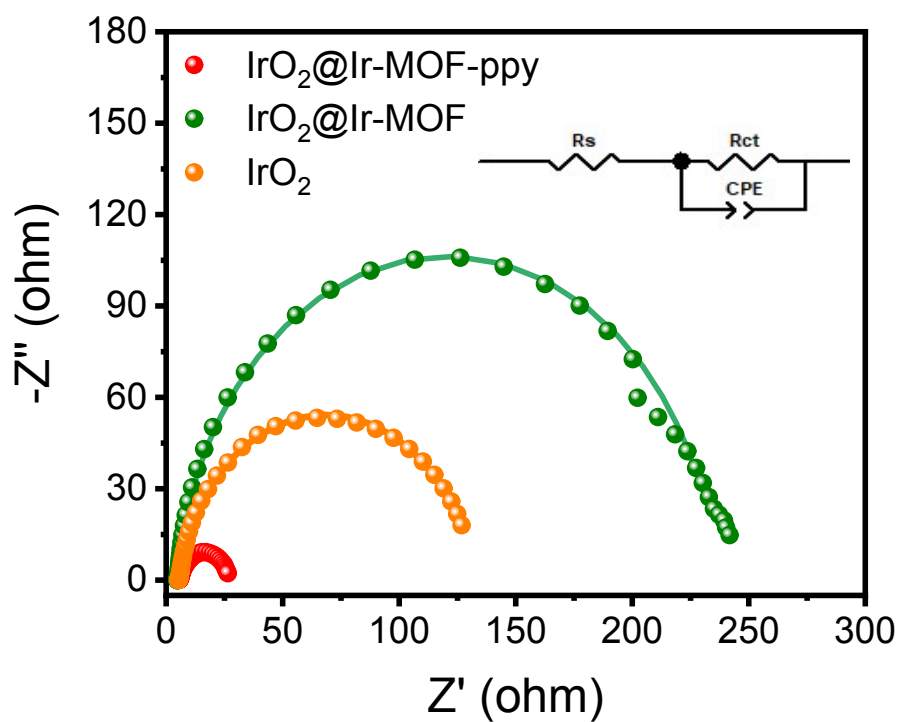

Figure S16. EIS spectra of corresponding catalysts recorded at 1.6 V vs RHE with 5 mV amplitude in a frequency range from  $10^5$  to 1 Hz.

Table S4. EIS data of various electrodes.

| <b>Sample</b>                     | <b><math>R_s/\Omega</math></b> | <b><math>R_{ct}/\Omega</math></b> |
|-----------------------------------|--------------------------------|-----------------------------------|
| <b>IrO<sub>2</sub>@Ir-MOF-ppy</b> | 5.553                          | 22.09                             |
| <b>IrO<sub>2</sub>@Ir-MOF</b>     | 4.955                          | 230                               |
| <b>IrO<sub>2</sub></b>            | 5.4                            | 126                               |
| <b>ppy</b>                        | 4.999                          | 6881                              |

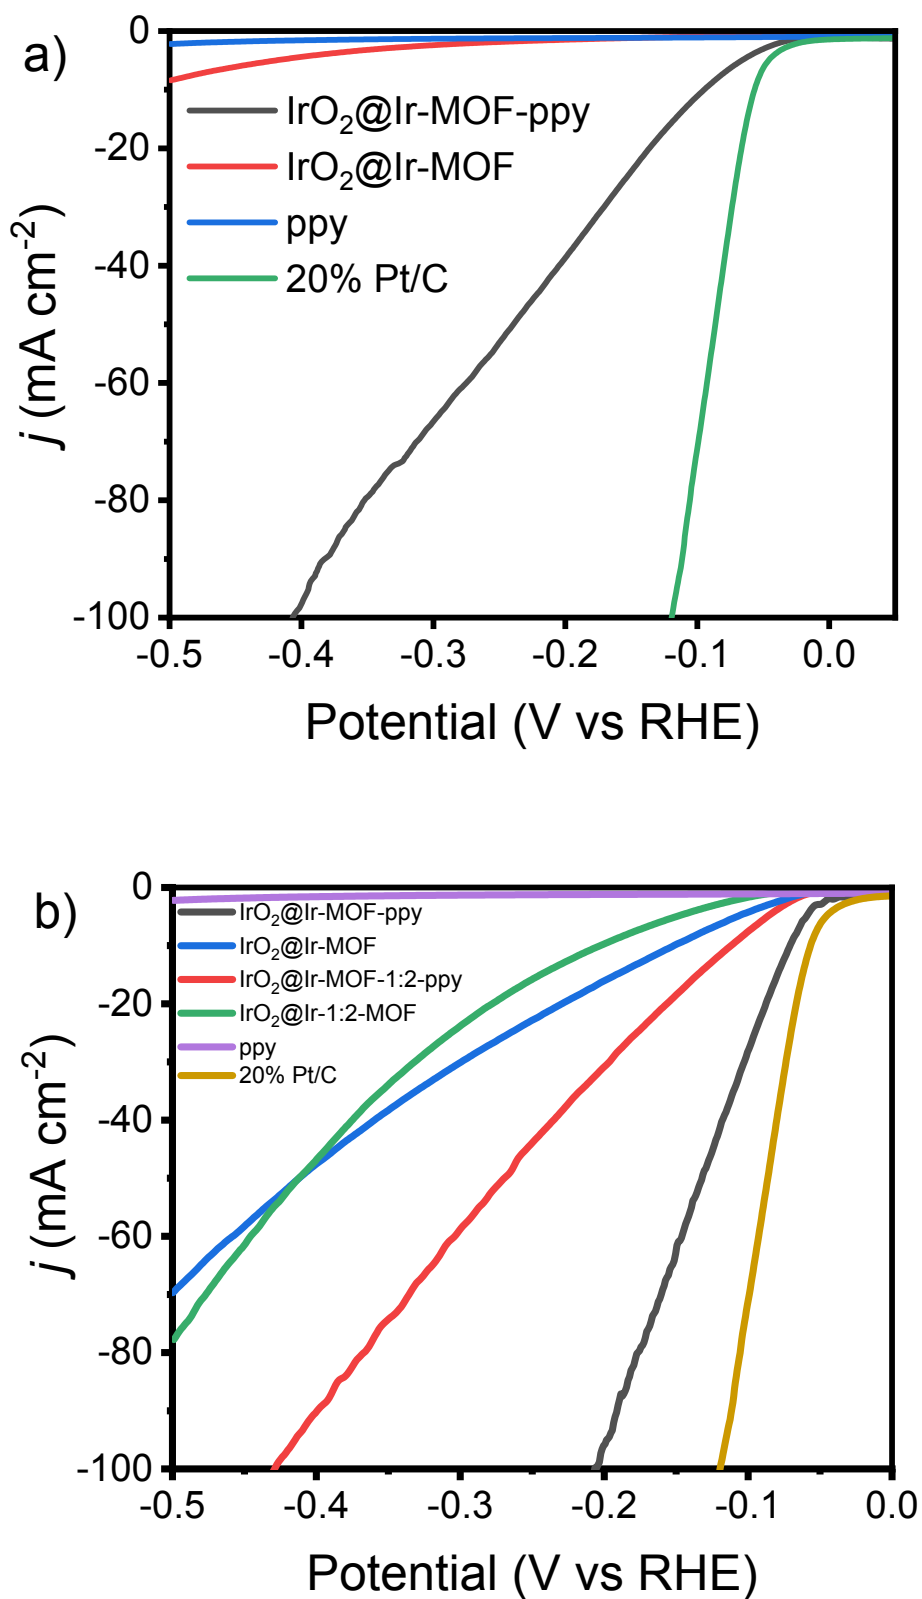

Figure S17. HER polarization curves of IrO<sub>2</sub>@Ir-MOF-ppy (a) and IrO<sub>2</sub>@Ir-MOF-1:2-ppy (b) with 80% *iR*-compensation in 1 M KOH solution at a scan rate of 5 mV/s.



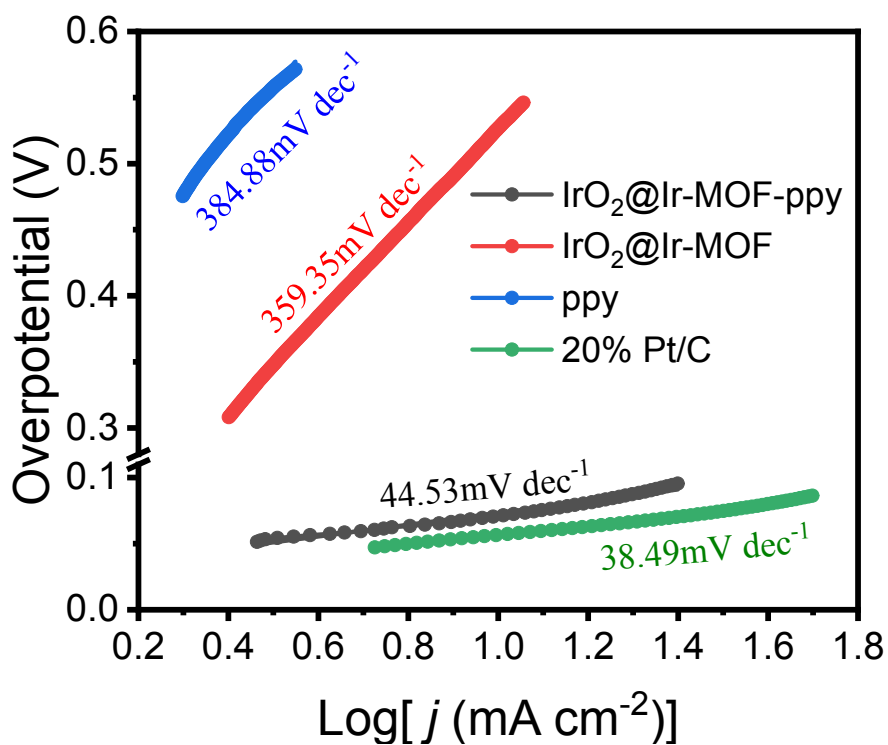

Figure S18. Tafel plots of different catalysts overpotential at different current densities of HER.

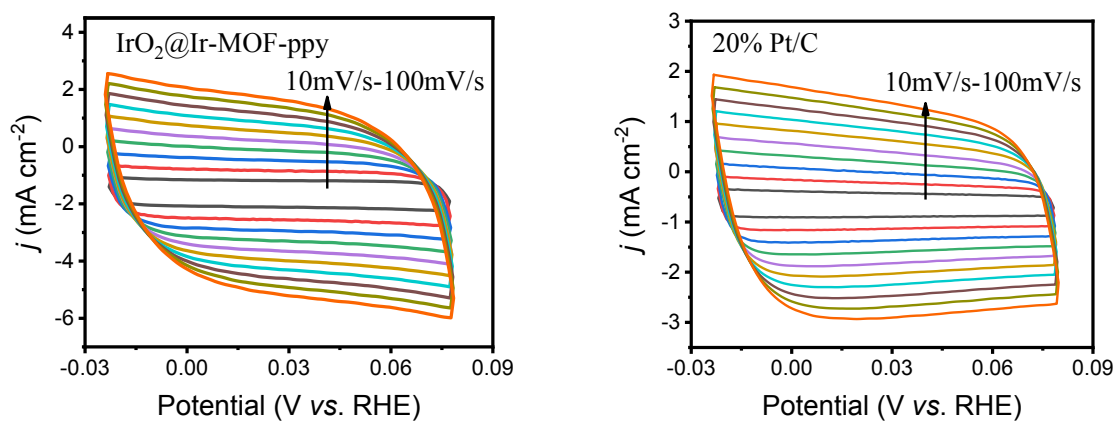

Figure S19. Cyclic voltammograms (CV) curves of IrO<sub>2</sub>@Ir-MOF-ppy and 20% Pt/C in the window of -0.022~0.078 V vs. RHE at various scan rates (10, 20, 30, 40, 50, 60, 70, 80, 90 and 100 mV/s).

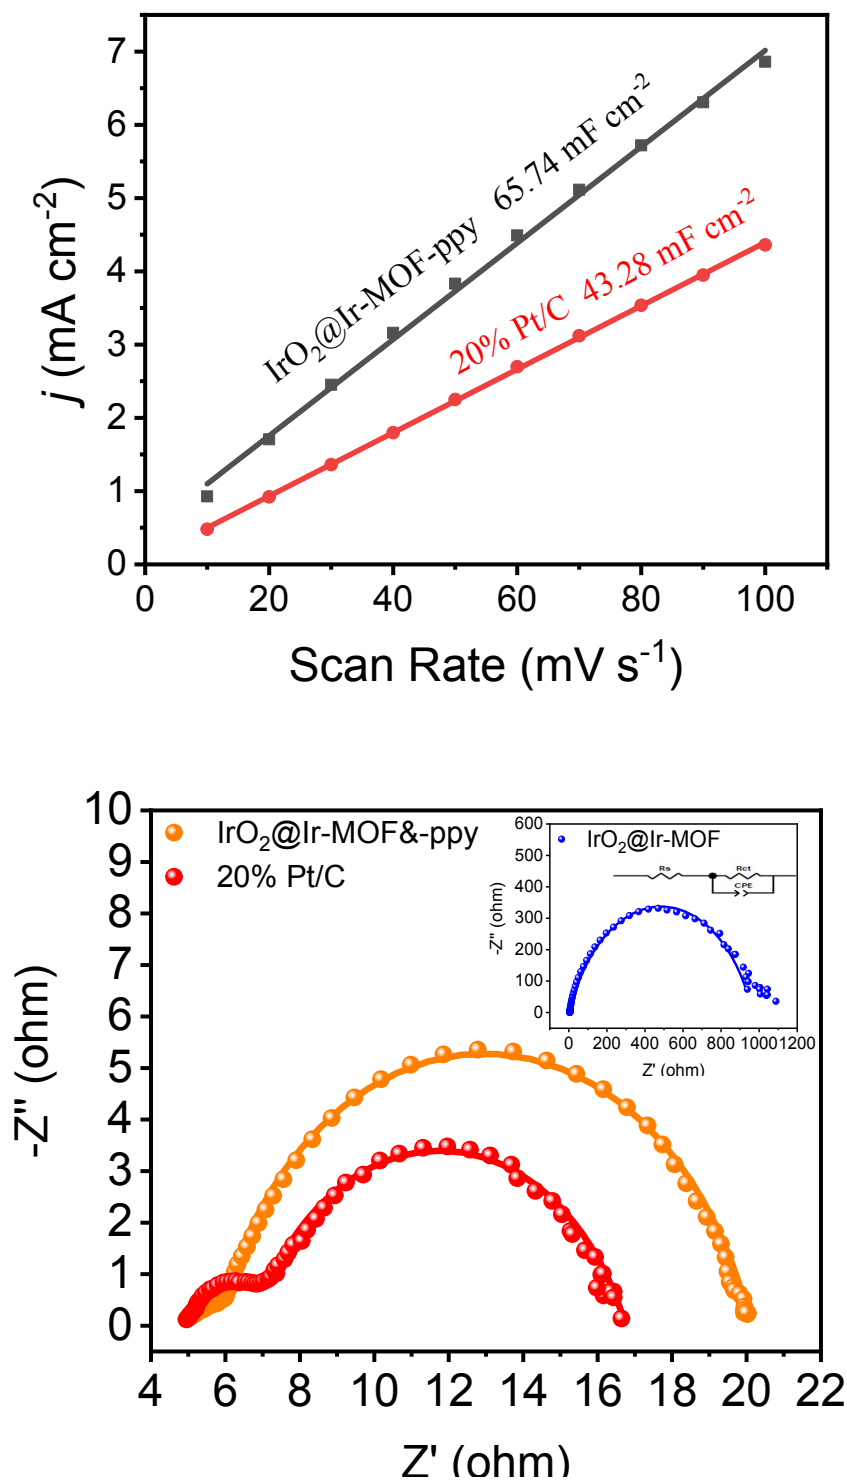

Figure S20. (left) The difference ( $\Delta j$ ) between capacitive currents as a function of scan rates to give the double-layer capacitance ( $C_{dl}$ ) for IrO<sub>2</sub>@Ir-MOF-ppy and 20% Pt/C. (right) EIS spectra of corresponding catalysts recorded at an overpotential of 150 mV with 5 mV amplitude in a frequency

range from  $10^5$  to 1 Hz.

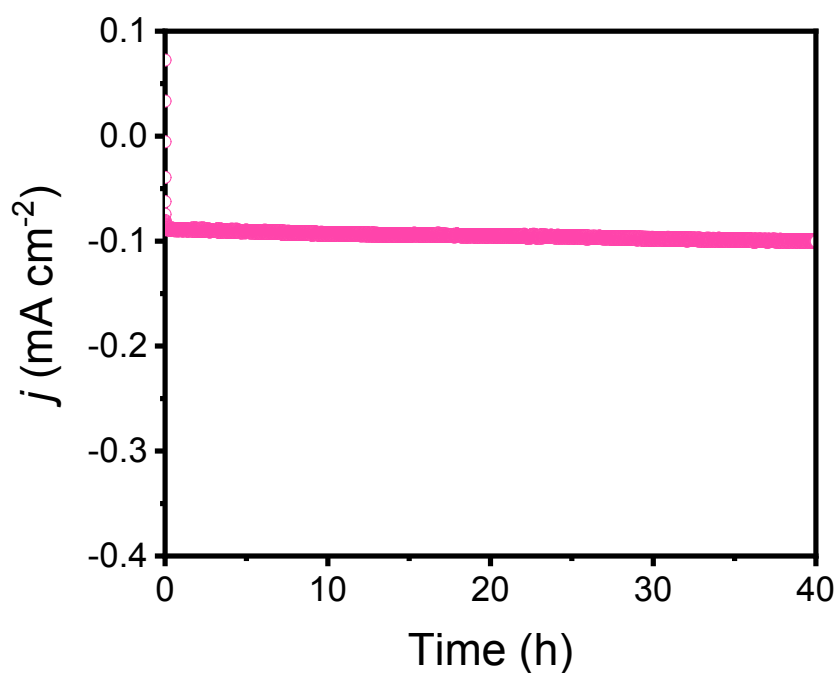

Figure S21. The stability test of  $\text{IrO}_2@\text{Ir-MOF-ppy}$  for HER at the current density around  $10 \text{ mA/cm}^2$  in 1M KOH with 80%  $iR$ -compensation.

Table S5. Summary of the recently reported water splitting electrocatalysts in 1 M KOH electrolytes.

| Anode                        | Cathode                      | Cell voltage /V | Ref                                                    |
|------------------------------|------------------------------|-----------------|--------------------------------------------------------|
| $\text{IrO}_2@\text{Ir-MOF}$ | $\text{IrO}_2@\text{Ir-MOF}$ | 1.53            | This work                                              |
| <b>RuO<sub>2</sub></b>       | Pt/C                         | 1.55            | <i>Angew. Chem. Int. Ed.</i> <b>2017</b> , 56, 573–577 |
| <b>Pt-CoS<sub>2</sub></b>    | Pt-CoS <sub>2</sub>          | 1.55            | <i>Adv. Energy Mater.</i> <b>2018</b> , 8, 1800935     |
| <b>Ir/MoS<sub>2</sub></b>    | Ir/MoS <sub>2</sub>          | 1.60            | <i>ACS Energy Lett.</i> <b>2019</b> , 4, 368-374       |
| Pt-IrO <sub>2</sub> /CC      | IrO <sub>2</sub> /CC         | 1.492           | <i>Adv. Energy Mater.</i> <b>2020</b> , 2001600        |
| Ru NWs                       | Ir NWs                       | 1.47            | <i>Adv. Funct. Mater.</i> <b>2018</b> , 28, 1803722    |
| RuCu NSs/C-350 °C            | RuCu NSs/C-250 °C            | 1.49            | <i>Angew. Chem. Int. Ed.</i> <b>2019</b> , 58, 2-8     |

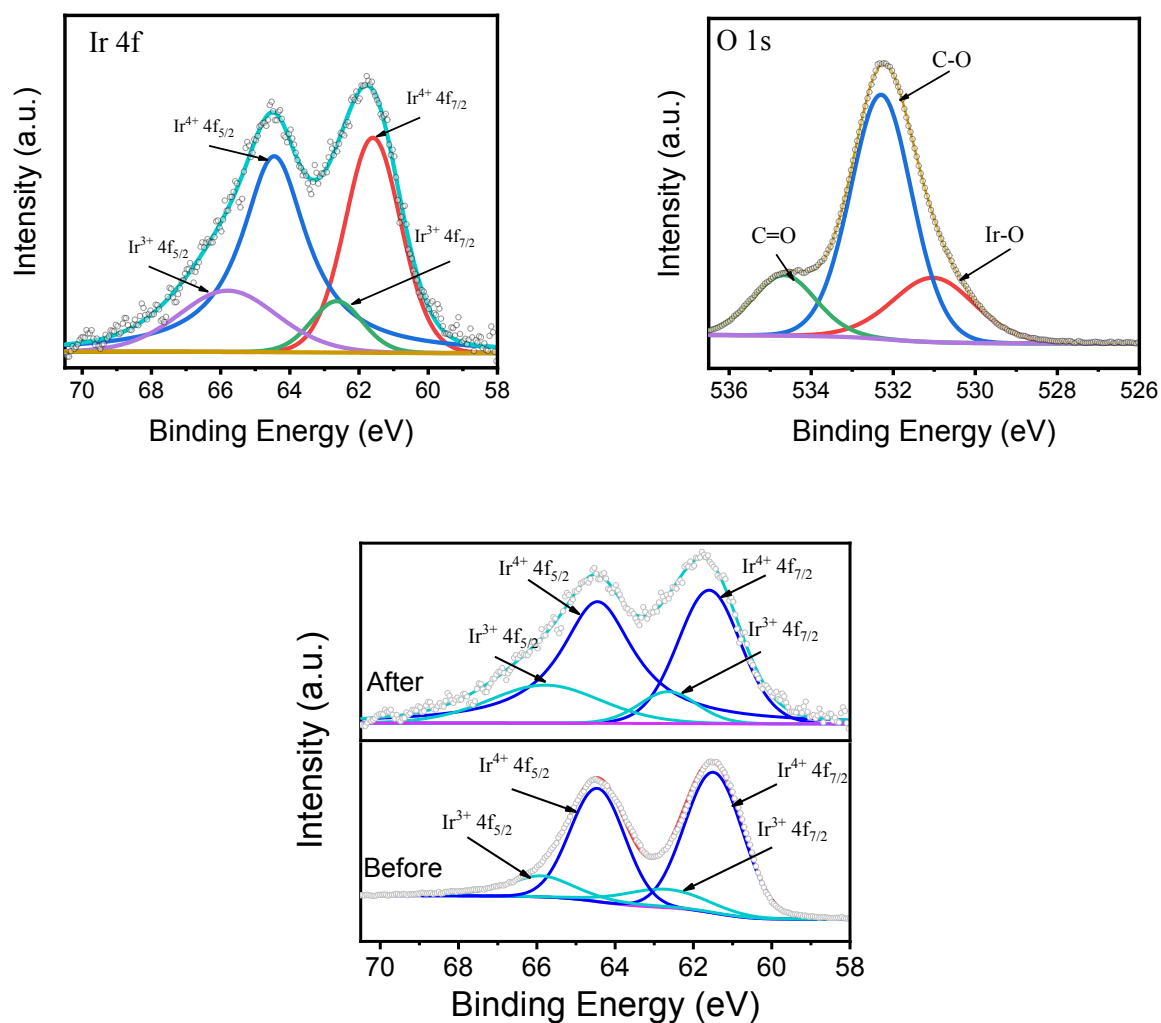

Figure S22. XPS spectra of IrO<sub>2</sub>@Ir-MOF after OER.

Table S6. The XPS peak position of IrO<sub>2</sub>@Ir-MOF before and after OER.

| After OER                               |       | Before OER                              |       |
|-----------------------------------------|-------|-----------------------------------------|-------|
| <b>Ir<sup>4+</sup> 4f<sub>7/2</sub></b> | 61.6  | <b>Ir<sup>4+</sup> 4f<sub>7/2</sub></b> | 61.5  |
| <b>Ir<sup>4+</sup> 4f<sub>5/2</sub></b> | 64.5  | <b>Ir<sup>4+</sup> 4f<sub>5/2</sub></b> | 64.5  |
| <b>Ir<sup>3+</sup> 4f<sub>7/2</sub></b> | 62.7  | <b>Ir<sup>3+</sup> 4f<sub>7/2</sub></b> | 62.6  |
| <b>Ir<sup>3+</sup> 4f<sub>5/2</sub></b> | 65.7  | <b>Ir<sup>3+</sup> 4f<sub>5/2</sub></b> | 65.9  |
| <b>O-Ir</b>                             | 531   | <b>O-Ir</b>                             | 530.8 |
| <b>O-C</b>                              | 532.3 | <b>O-C</b>                              | 532.0 |
| <b>O=C</b>                              | 533.7 | <b>O=C</b>                              | 533.4 |

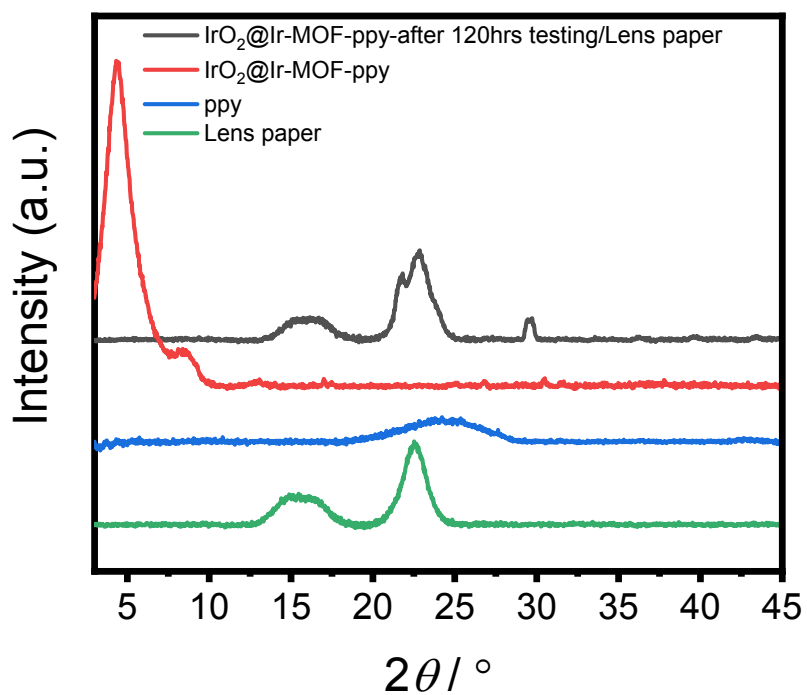

Figure S23. PXRD pattern of IrO<sub>2</sub>@Ir-MOF-ppy after long-term water splitting experiment.

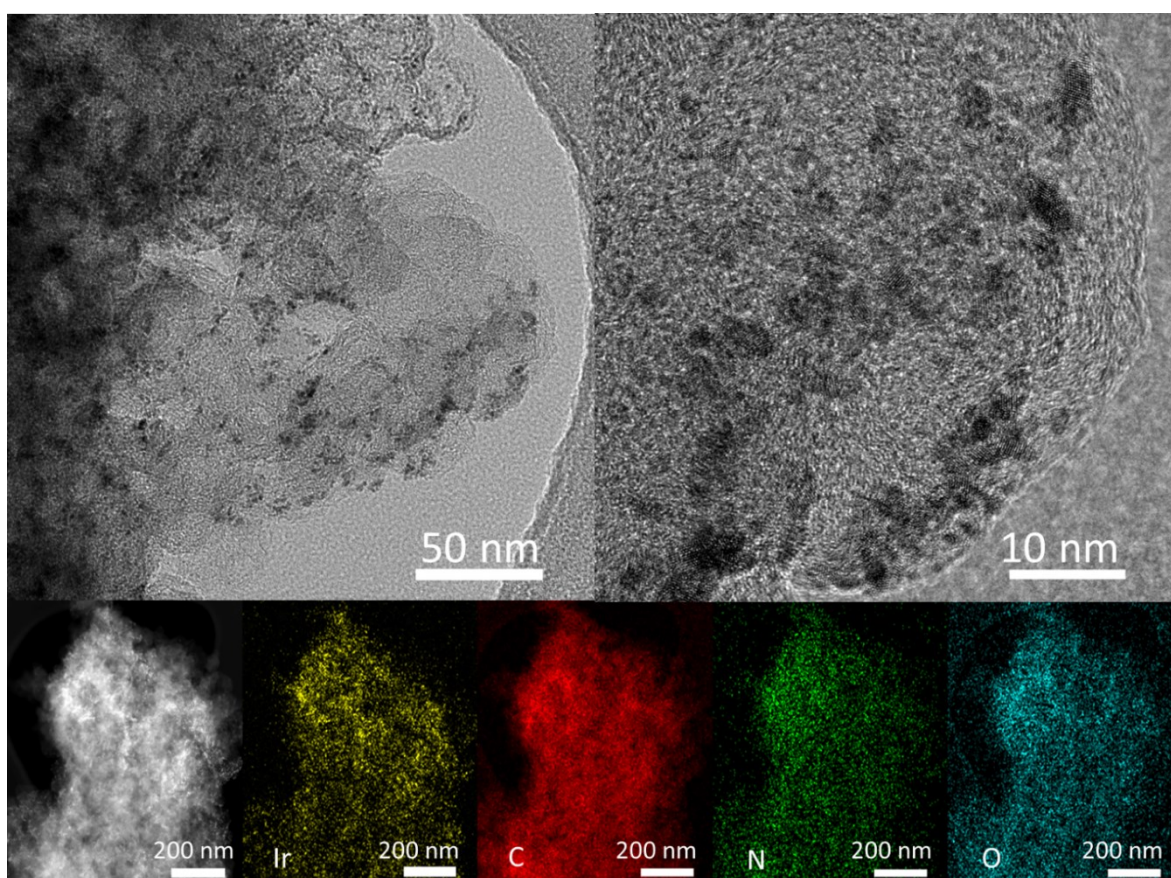

Figure S24. TEM images of IrO<sub>2</sub>@Ir-MOF-ppy after long-term water splitting experiment.

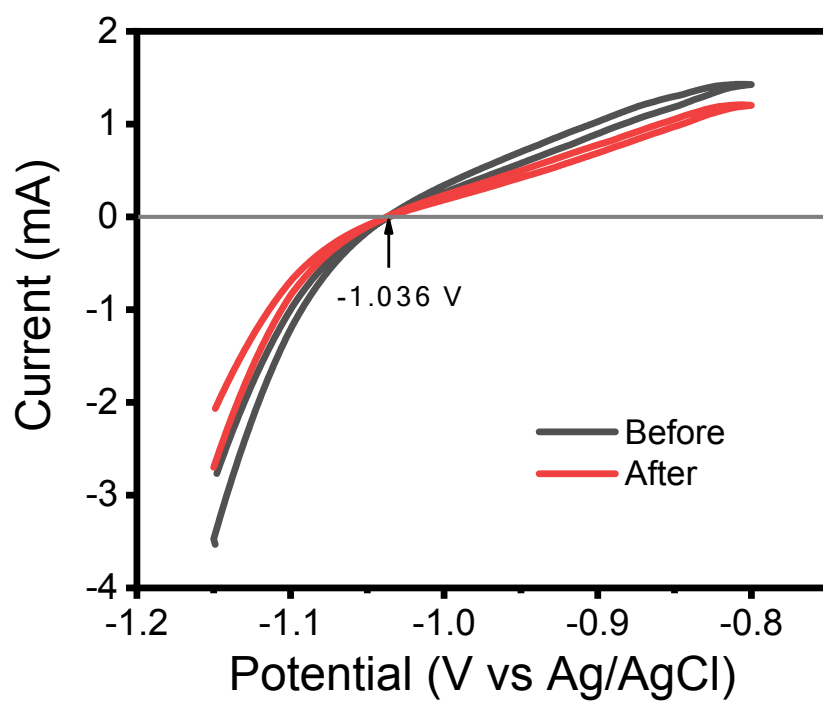

Figure S25. RHE correction diagram of Ag/AgCl reference electrode used in the experiment in 1 M KOH system before and after long-term water splitting experiment.
